# Supplementary material
Source: PubMed Central journal article supplement (PMC2785600)
Supplement: supp_M109.020818_jbc.M109.020818-1.pdf [file supp_M109.020818_jbc.M109.020818-1.pdf]

Supplemental Table 1.

All values reported are fold changes. Data highlighted in green are significantly reduced and data highlighted in red are significantly increased (P<0.05). Values in white boxes indicate no significant differences between the two groups. 22%-22% fat diet. M42%-Modified 42% fat diet.

|                                               |                                | DIET COMP BY GENOTYPE |                  |                     | GENOTYPE COMP BY DIET |                    |
|-----------------------------------------------|--------------------------------|-----------------------|------------------|---------------------|-----------------------|--------------------|
| PATHWAY                                       | CHEMICAL                       | MPSI M42% / MPSI 22%  | WT M42% / WT 22% | MPSI M42% / WT M42% | MPSI 22% / WT 22%     | MPSI M42% / WT 22% |
| Alanine and aspartate metabolism              | alanine                        | 1.5                   | 1.8              | 1.5                 | 1.2                   | 1.2                |
|                                               | asparagine                     | 1.4                   | 1.5              | 2.6                 | 2.4                   | 1.8                |
|                                               | aspartate                      | 1.7                   | 1.6              | 1.9                 | 1.9                   | 1.2                |
|                                               | beta-alanine                   | 1.6                   | 1.2              | 1.9                 | 1.0                   | 1.6                |
| Butanoate metabolism                          | 2,4-diaminobutyrate            | 1.2                   | 0.8              | 1.2                 | 0.8                   | 0.9                |
|                                               | 2-aminobutyrate                | 1.0                   | 1.6              | 1.3                 | 2.0                   | 2.1                |
| Creatine metabolism                           | creatine                       | 1.3                   | 1.1              | 1.1                 | 1.3                   | 1.0                |
| Cysteine, methionine, SAM, taurine metabolism | cysteine                       | 2.7                   | 2.4              | 2.2                 | 2.6                   | 1.1                |
|                                               | hypotaurine                    | 2.0                   | 1.5              | 1.8                 | 1.4                   | 2.8                |
|                                               | methionine                     | 1.6                   | 1.3              | 1.8                 | 2.1                   | 1.3                |
|                                               | S-adenosylhomocysteine (SAH)   | 1.2                   | 1.5              | 2.7                 | 1.4                   | 1.7                |
|                                               | taurine                        | 2.1                   | 1.8              | 1.6                 | 1.8                   | 1.2                |
| Glutamate metabolism                          | gamma-aminobutyrate (GABA)     | 2.1                   | 3.3              | 1.0                 | 1.5                   | 3.2                |
|                                               | glutamate                      | 1.4                   | 2.0              | 1.6                 | 1.1                   | 1.3                |
|                                               | glutamine                      | 1.4                   | 3.5              | 1.2                 | 2.8                   | 4.1                |
|                                               | N-acetylglutamate              | 1.2                   | 1.8              | 1.1                 | 1.4                   | 1.7                |
|                                               | N-acetylglutamine              | 1.0                   | 0.9              | 1.2                 | 1.1                   | 1.1                |
|                                               | N-methylglutamate              | 1.4                   | 1.3              | 0.9                 | 0.8                   | 1.2                |
| Glutathione metabolism                        | cysteine-glutathione disulfide | 10.7                  | 2.0              | 3.1                 | 1.7                   | 6.3                |
|                                               | glutathione, oxidized (GSSG)   | 1.0                   | 1.2              | 1.1                 | 1.4                   | 1.3                |
|                                               | glutathione, reduced (GSH)     | 2.9                   | 2.7              | 3.1                 | 2.8                   | 8.3                |
|                                               | ophthalmate                    | 1.2                   | 1.9              | 1.2                 | 1.3                   | 1.6                |
|                                               | pyroglutamate (5-oxoproline)   | 1.4                   | 1.2              | 1.1                 | 1.3                   | 1.1                |
|                                               | S-lactoylglutathione           | 2.0                   | 1.6              | 1.3                 | 1.0                   | 2.0                |
|                                               | S-methylglutathione            | 1.4                   | 1.1              | 1.2                 | 1.4                   | 1.0                |
| Glycine, serine and threonine metabolism      | betaine                        | 1.1                   | 1.2              | 1.1                 | 1.2                   | 1.3                |
|                                               | betaine aldehyde               | 1.0                   | 2.8              | 2.1                 | 6.0                   | 6.0                |
|                                               | butyrylglycine                 | 1.6                   | 1.1              | 1.4                 | 1.1                   | 1.5                |
|                                               | glycine                        | 1.4                   | 1.5              | 1.7                 | 1.5                   | 1.1                |
|                                               | hexanoylglycine                | 1.4                   | 1.2              | 1.0                 | 1.2                   | 1.2                |
|                                               | serine                         | 1.4                   | 1.4              | 2.2                 | 2.1                   | 1.5                |
|                                               | threonine                      | 1.6                   | 1.2              | 1.7                 | 2.1                   | 1.4                |
| Histidine metabolism                          | histidine                      | 1.5                   | 1.2              | 1.1                 | 1.9                   | 1.3                |
| Lysine metabolism                             | 2-aminoadipate                 | 2.0                   | 2.7              | 1.7                 | 2.2                   | 4.5                |
|                                               | lysine                         | 1.3                   | 1.7              | 2.0                 | 1.5                   | 1.2                |
|                                               | pipecolate                     | 1.0                   | 1.1              | 1.1                 | 1.1                   | 1.2                |

|                                                              |                                   |      |     |      |     |      |
|--------------------------------------------------------------|-----------------------------------|------|-----|------|-----|------|
| Phenylalanine & tyrosine metabolism                          | 3-(4-hydroxyphenyl)lactate        | 2.2  | 1.9 | 2.0  | 1.7 | 3.7  |
|                                                              | p-cresol sulfate                  | 1.2  | 1.6 | 0.8  | 1.1 | 1.3  |
|                                                              | phenylacetylglycine               | 0.9  | 0.8 | 0.9  | 0.8 | 0.7  |
|                                                              | phenylalanine                     | 1.3  | 1.3 | 1.8  | 1.8 | 1.4  |
|                                                              | tyrosine                          | 1.4  | 1.6 | 1.9  | 1.8 | 1.2  |
| Polyamine metabolism                                         | 5-methylthioadenosine (MTA)       | 1.4  | 1.9 | 1.3  | 1.0 | 1.4  |
|                                                              | spermidine                        | 1.0  | 1.3 | 1.3  | 1.6 | 1.7  |
| Tryptophan metabolism                                        | 3-indoxyl sulfate                 | 0.8  | 0.8 | 1.0  | 1.0 | 0.8  |
|                                                              | anthranilate                      | 1.5  | 1.9 | 1.6  | 2.0 | 3.0  |
|                                                              | kynurenine                        | 2.3  | 1.5 | 1.1  | 1.3 | 1.7  |
|                                                              | tryptophan                        | 1.4  | 1.3 | 2.2  | 2.5 | 1.7  |
| Urea cycle; arginine-, proline-, metabolism                  | arginine                          | 1.0  | 1.1 | 1.2  | 1.3 | 1.3  |
|                                                              | citrulline                        | 1.4  | 1.2 | 1.1  | 1.8 | 1.3  |
|                                                              | dimethylarginine                  | 1.5  | 1.4 | 1.8  | 1.8 | 1.2  |
|                                                              | ornithine                         | 1.4  | 1.2 | 1.3  | 1.5 | 1.1  |
|                                                              | proline                           | 1.9  | 2.7 | 2.7  | 1.9 | 1.0  |
|                                                              | urea                              | 1.4  | 1.1 | 1.1  | 1.3 | 1.1  |
| Valine, leucine and isoleucine metabolism                    | isoleucine                        | 1.3  | 1.4 | 1.8  | 1.8 | 1.3  |
|                                                              | leucine                           | 1.2  | 1.2 | 1.4  | 1.4 | 1.1  |
|                                                              | N-acetylalanine                   | 1.3  | 1.2 | 1.5  | 1.6 | 1.3  |
|                                                              | valine                            | 1.6  | 1.4 | 1.7  | 2.0 | 1.3  |
| Aminosugars metabolism                                       | N-acetylneuraminat                | 0.7  | 0.8 | 1.1  | 1.3 | 0.9  |
| Fructose, mannose, galactose, starch, and sucrose metabolism | fructose                          | 1.3  | 2.6 | 1.3  | 2.5 | 2.0  |
|                                                              | maltohexose                       | 45.5 | 1.3 | 17.4 | 2.0 | 23.0 |
|                                                              | maltose                           | 1.8  | 2.8 | 4.4  | 1.2 | 1.5  |
|                                                              | maltotetraose                     | 5.1  | 1.8 | 6.3  | 1.4 | 3.5  |
|                                                              | maltotriose                       | 4.7  | 1.8 | 7.2  | 1.2 | 3.9  |
|                                                              | mannitol                          | 1.8  | 3.1 | 1.5  | 2.6 | 4.6  |
|                                                              | mannose                           | 1.4  | 2.4 | 1.9  | 1.6 | 1.2  |
|                                                              | mannose-6-phosphate               | 3.7  | 1.4 | 2.3  | 1.1 | 3.3  |
| Glycolysis, gluconeogenesis, pyruvate metabolism             | 1,5-anhydroglucitol (1,5-AG)      | 3.1  | 2.4 | 1.4  | 1.0 | 3.3  |
|                                                              | 3-phosphoglycerate                | 1.6  | 1.8 | 1.0  | 1.1 | 1.7  |
|                                                              | fructose-6-phosphate              | 3.7  | 2.0 | 2.0  | 1.1 | 4.0  |
|                                                              | glucose                           | 1.0  | 2.0 | 1.3  | 1.5 | 1.5  |
|                                                              | glucose-6-phosphate (G6P)         | 4.5  | 2.1 | 2.5  | 1.2 | 5.2  |
|                                                              | glucuronate                       | 1.4  | 1.3 | 1.4  | 1.3 | 1.1  |
|                                                              | lactate                           | 1.5  | 2.4 | 1.1  | 1.3 | 2.1  |
|                                                              | phosphoenolpyruvate (PEP)         | 1.6  | 1.6 | 1.1  | 1.0 | 1.5  |
| Nucleotide sugars, pentose metabolism                        | 6-phosphogluconate                | 0.8  | 1.0 | 1.0  | 1.2 | 1.0  |
|                                                              | gluconate                         | 1.7  | 2.1 | 1.7  | 2.1 | 3.5  |
|                                                              | maltopentaose                     | 17.3 | 1.3 | 8.1  | 2.8 | 6.1  |
|                                                              | ribitol (adonitol)                | 2.3  | 2.0 | 2.9  | 2.6 | 6.0  |
|                                                              | ribonate                          | 1.1  | 1.6 | 1.1  | 1.7 | 1.8  |
|                                                              | ribose                            | 1.5  | 1.8 | 1.1  | 1.3 | 1.9  |
|                                                              | ribose 5-phosphate                | 1.0  | 1.2 | 1.7  | 1.5 | 1.5  |
|                                                              | UDP-glucose                       | 1.9  | 2.2 | 1.7  | 2.5 | 1.3  |
|                                                              | xylitol                           | 1.1  | 1.6 | 1.4  | 1.3 | 1.1  |
| Ascorbate and aldarate metabolism                            | ascorbate (Vitamin C)             | 2.2  | 2.1 | 2.3  | 2.2 | 4.9  |
|                                                              | gulono-1,4-lactone                | 1.6  | 1.3 | 2.2  | 1.1 | 1.7  |
|                                                              | threonate                         | 2.1  | 2.3 | 1.3  | 1.2 | 1.8  |
| Folate metabolism                                            | 5-methyltetrahydrofolate (5MeTHF) | 1.5  | 1.5 | 1.9  | 2.0 | 1.3  |

|                                        |                                                       |     |      |      |     |      |
|----------------------------------------|-------------------------------------------------------|-----|------|------|-----|------|
|                                        | biopterin                                             | 0.8 | 0.6  | 1.0  | 0.8 | 0.6  |
|                                        | dihydrobiopterin                                      | 1.1 | 0.7  | 1.8  | 1.1 | 1.3  |
| Hemoglobin and porphyrin metabolism    | heme*                                                 | 1.5 | 42.2 | 3.0  | 9.6 | 14.2 |
|                                        | biliverdin                                            | 1.4 | 3.9  | 1.2  | 2.3 | 3.3  |
| Nicotinate and nicotinamide metabolism | nicotinamide                                          | 1.1 | 1.3  | 1.3  | 1.5 | 1.7  |
|                                        | nicotinamide adenine dinucleotide (NAD <sup>+</sup> ) | 1.6 | 1.0  | 2.2  | 1.5 | 2.3  |
| Pantothenate and CoA metabolism        | 3'-dephosphocoenzyme A                                | 1.4 | 3.0  | 1.6  | 3.5 | 4.9  |
|                                        | pantothenate                                          | 1.7 | 1.7  | 1.3  | 1.3 | 2.2  |
|                                        | phosphopantetheine                                    | 1.6 | 4.0  | 1.3  | 2.0 | 3.1  |
| Riboflavin metabolism                  | flavin adenine dinucleotide (FAD <sup>+</sup> )       | 1.2 | 1.0  | 1.5  | 1.2 | 1.4  |
|                                        | riboflavin (Vitamin B2)                               | 1.2 | 1.7  | 1.1  | 1.3 | 1.5  |
| Thiamine metabolism                    | thiamin (Vitamin B1)                                  | 1.5 | 1.0  | 2.4  | 1.6 | 2.4  |
| Tocopherol metabolism                  | alpha-tocopherol                                      | 2.4 | 2.3  | 1.1  | 1.0 | 2.5  |
| Vitamin B6 metabolism                  | pyridoxate                                            | 1.6 | 2.6  | 1.9  | 1.2 | 1.3  |
| Krebs cycle                            | cis-aconitate                                         | 1.8 | 1.1  | 1.7  | 1.1 | 1.9  |
|                                        | citrate                                               | 2.9 | 1.9  | 2.1  | 1.4 | 4.0  |
|                                        | fumarate                                              | 1.2 | 1.3  | 1.1  | 1.1 | 1.3  |
|                                        | malate                                                | 1.4 | 1.4  | 1.1  | 1.1 | 1.5  |
|                                        | oxaloacetate                                          | 0.8 | 1.1  | 1.2  | 1.5 | 1.3  |
| Oxidative phosphorylation              | acetylphosphate                                       | 0.9 | 1.0  | 1.1  | 1.1 | 1.1  |
|                                        | phosphate                                             | 0.9 | 1.0  | 0.9  | 1.0 | 0.9  |
| Bile acid metabolism                   | 12-dehydrocholate                                     | 0.7 | 0.4  | 0.8  | 0.5 | 0.3  |
|                                        | alpha-muricholate                                     | 1.1 | 1.4  | 1.9  | 1.2 | 1.3  |
|                                        | beta-muricholate                                      | 1.0 | 2.7  | 2.1  | 1.2 | 1.3  |
|                                        | cholate                                               | 5.7 | 1.7  | 3.3  | 1.0 | 5.7  |
|                                        | deoxycholate                                          | 1.5 | 1.6  | 1.1  | 1.1 | 1.4  |
|                                        | tauro-beta-muricholate                                | 3.9 | 1.0  | 3.1  | 1.2 | 3.2  |
|                                        | taurocholate                                          | 4.1 | 1.3  | 2.8  | 1.1 | 3.7  |
|                                        | taurodeoxycholate                                     | 1.4 | 1.8  | 1.4  | 1.1 | 1.3  |
|                                        | ursodeoxycholate                                      | 1.3 | 1.7  | 1.3  | 1.0 | 1.4  |
| Carnitine metabolism                   | 2-methylbutyroylcarnitine                             | 1.0 | 0.7  | 1.4  | 0.9 | 0.9  |
|                                        | 3-dehydrocarnitine                                    | 1.5 | 1.9  | 1.3  | 1.0 | 1.5  |
|                                        | acetylcarnitine                                       | 2.8 | 1.1  | 11.6 | 3.7 | 10.2 |
|                                        | carnitine                                             | 1.0 | 0.8  | 1.0  | 0.9 | 0.8  |
|                                        | glutaroyl carnitine                                   | 1.8 | 1.3  | 1.4  | 1.0 | 1.8  |
|                                        | isobutyrylcarnitine                                   | 1.3 | 1.0  | 2.2  | 1.6 | 2.1  |
|                                        | isovalerylcarnitine                                   | 1.4 | 2.0  | 1.1  | 1.3 | 1.8  |
|                                        | propionylcarnitine                                    | 1.5 | 1.2  | 1.1  | 2.1 | 1.3  |
| Fatty acid, amide                      | oleamide                                              | 1.8 | 4.2  | 1.2  | 2.0 | 3.6  |
| Fatty acid, monoene                    | 5-dodecenoate (12:1n7)                                | 1.1 | 1.4  | 1.6  | 1.1 | 1.2  |
|                                        | docosatrienoate (22:3n3)                              | 7.2 | 5.5  | 1.2  | 1.1 | 6.5  |
|                                        | eicosenoate (20:1n9 or 11)                            | 1.5 | 1.3  | 0.8  | 0.7 | 1.1  |
|                                        | myristoleate (14:1n5)                                 | 1.1 | 1.3  | 1.5  | 1.2 | 1.1  |
|                                        | oleate (18:1n9)                                       | 1.3 | 1.1  | 1.2  | 1.4 | 1.1  |
|                                        | palmitoleate (16:1n7)                                 | 1.5 | 1.1  | 1.3  | 1.8 | 1.2  |
| Fatty acid, monoene, odd               | 10-heptadecenoate (17:1n7)                            | 2.1 | 1.9  | 1.2  | 1.3 | 1.6  |
|                                        | 10-nonadecenoate (19:1n9)                             | 2.5 | 2.0  | 1.1  | 1.2 | 2.1  |
| Fatty acid, polyene                    | adrenate (22:4n6)                                     | 0.8 | 1.2  | 0.9  | 1.3 | 1.1  |
|                                        | arachidonate (20:4n6)                                 | 1.2 | 1.1  | 1.9  | 1.5 | 1.8  |
|                                        | dihomo-alpha-linolenate (20:3n3)                      | 1.6 | 1.1  | 2.5  | 1.4 | 2.2  |

|                             |                                            |     |     |     |     |     |
|-----------------------------|--------------------------------------------|-----|-----|-----|-----|-----|
|                             | dihomo-linolenate (20:2n6)                 | 0.7 | 0.9 | 0.7 | 0.9 | 0.6 |
|                             | docosadienoate (22:2n6)                    | 0.8 | 0.7 | 1.1 | 1.0 | 0.8 |
|                             | docosahexaenoate (DHA; 22:6n3)             | 3.1 | 1.9 | 1.7 | 1.0 | 3.1 |
|                             | docosapentaenoate (n3 DPA; 22:5n3)         | 2.2 | 2.5 | 1.4 | 1.2 | 1.9 |
|                             | eicosapentaenoate (EPA; 20:5n3)            | 6.1 | 4.0 | 2.2 | 1.4 | 8.8 |
|                             | linoleate (18:2n6)                         | 1.5 | 1.5 | 1.1 | 1.1 | 1.6 |
|                             | linolenate [alpha or gamma; (18:3n3 or 6)] | 1.5 | 2.0 | 1.1 | 1.2 | 1.7 |
|                             | stearidonate (18:4n3)                      | 2.3 | 4.1 | 1.3 | 1.4 | 3.2 |
| Fatty acid, saturated, even | arachidate (20:0)                          | 1.0 | 2.0 | 1.7 | 1.1 | 1.2 |
|                             | caprate (10:0)                             | 1.2 | 1.2 | 1.7 | 1.1 | 1.4 |
|                             | caproate (6:0)                             | 0.8 | 1.0 | 0.8 | 1.0 | 0.8 |
|                             | caprylate (8:0)                            | 1.2 | 1.0 | 1.7 | 1.4 | 1.7 |
|                             | laurate (12:0)                             | 1.2 | 1.1 | 1.4 | 1.0 | 1.2 |
|                             | myristate (14:0)                           | 1.4 | 2.1 | 1.3 | 1.1 | 1.6 |
|                             | palmitate (16:0)                           | 1.1 | 1.2 | 1.1 | 1.2 | 1.3 |
| Fatty acid, saturated, even | stearate (18:0)                            | 1.0 | 1.2 | 1.2 | 1.5 | 1.5 |
| Fatty acid, saturated, odd  | heptanoate (7:0)                           | 0.7 | 1.1 | 0.6 | 1.0 | 0.7 |
|                             | margarate (17:0)                           | 1.0 | 2.0 | 1.2 | 1.6 | 1.6 |
|                             | nonadecanoate (19:0)                       | 1.5 | 2.4 | 1.1 | 1.5 | 2.2 |
|                             | pelargonate (9:0)                          | 1.3 | 1.1 | 1.6 | 1.1 | 1.4 |
|                             | pentadecanoate (15:0)                      | 1.5 | 1.2 | 1.3 | 1.1 | 1.6 |
| Glycerolipid metabolism     | 1-arachidonoylglycerophosphocholine        | 1.0 | 2.0 | 8.3 | 4.2 | 4.2 |
|                             | 1-linoleoylglycerophosphocholine           | 1.9 | 4.5 | 5.6 | 2.4 | 1.2 |
|                             | 1-oleoylglycerophosphocholine              | 2.0 | 4.5 | 3.4 | 1.5 | 1.3 |
|                             | 1-palmitoylglycerophosphocholine           | 0.8 | 2.1 | 0.4 | 1.1 | 0.9 |
|                             | 1-stearoylglycerophosphocholine            | 1.0 | 2.2 | 0.5 | 1.1 | 1.1 |
|                             | 1-stearoylglycerophosphoethanolamine       | 1.1 | 1.6 | 0.6 | 0.8 | 0.9 |
|                             | 2-arachidonoylglycerophosphocholine        | 0.8 | 3.7 | 0.5 | 2.4 | 2.0 |
|                             | 2-linoleoylglycerophosphocholine           | 0.8 | 1.8 | 0.5 | 1.1 | 0.9 |
|                             | 2-oleoylglycerophosphocholine              | 2.2 | 5.3 | 1.7 | 1.4 | 3.1 |
|                             | 2-palmitoylglycerophosphocholine           | 1.3 | 5.1 | 3.3 | 1.1 | 1.5 |
|                             | 2-stearoylglycerophosphocholine            | 1.2 | 2.9 | 0.5 | 1.1 | 1.3 |
|                             | choline                                    | 1.4 | 1.5 | 1.2 | 1.1 | 1.3 |
|                             | choline phosphate                          | 1.2 | 1.1 | 1.4 | 1.3 | 1.5 |
|                             | glycerol                                   | 1.0 | 2.0 | 1.3 | 1.4 | 1.5 |
|                             | glycerol 3-phosphate (G3P)                 | 1.1 | 1.4 | 3.0 | 2.1 | 2.2 |
|                             | glycerophosphorylcholine (GPC)             | 1.1 | 1.6 | 3.0 | 1.8 | 1.9 |
|                             | monoethanolamine                           | 1.1 | 1.5 | 1.5 | 2.0 | 2.1 |
| o-phosphoethanolamine       | 1.1                                        | 1.2 | 1.2 | 1.3 | 1.4 |     |
| Inositol metabolism         | inositol 1-phosphate (I1P)                 | 1.1 | 1.4 | 1.2 | 1.5 | 1.6 |
|                             | myo-inositol                               | 2.0 | 1.5 | 1.1 | 1.4 | 1.4 |
| Ketone bodies               | 3-hydroxybutyrate (BHBA)                   | 1.1 | 1.7 | 1.7 | 1.2 | 1.0 |
| Monoacylglycerol            | 1-oleoylglycerol (1-monoolein)             | 4.6 | 1.4 | 3.6 | 1.1 | 5.0 |
|                             | 1-palmitoylglycerol (1-monopalmitin)       | 1.5 | 1.6 | 1.9 | 1.2 | 1.2 |
|                             | 1-stearoylglycerol (1-monostearin)         | 1.2 | 2.0 | 1.1 | 1.5 | 1.8 |
| Monoglycerol                | myristoylglycerol (monomyristin)           | 1.2 | 1.2 | 0.9 | 1.0 | 1.1 |
| Phospholipid metabolism     | cytidine 5'-diphosphocholine               | 0.9 | 1.8 | 0.7 | 1.5 | 1.3 |
| Sphingolipid                | sphinganine                                | 1.7 | 8.8 | 1.1 | 5.5 | 9.6 |

|                                                            |                                   |     |     |     |     |     |
|------------------------------------------------------------|-----------------------------------|-----|-----|-----|-----|-----|
|                                                            | sphingosine                       | 1.3 | 7.8 | 1.3 | 4.6 | 6.0 |
| Sterol/Steroid                                             | campesterol                       | 1.8 | 2.8 | 5.3 | 1.0 | 1.9 |
|                                                            | cholesterol                       | 1.0 | 1.1 | 1.3 | 1.4 | 1.4 |
|                                                            | corticosterone                    | 1.1 | 1.4 | 0.8 | 1.1 | 1.2 |
|                                                            |                                   |     |     |     |     |     |
| Purine metabolism,<br>(hypo)xanthine/inosine<br>containing | hypoxanthine                      | 1.1 | 1.0 | 1.4 | 1.3 | 1.3 |
|                                                            | inosine                           | 1.1 | 1.2 | 1.5 | 1.4 | 1.3 |
|                                                            | inosine 5'-monophosphate (IMP)    | 1.0 | 2.0 | 2.0 | 1.0 | 1.0 |
|                                                            | xanthine                          | 1.2 | 1.2 | 1.2 | 1.2 | 1.5 |
|                                                            | xanthosine                        | 1.7 | 2.7 | 1.1 | 1.8 | 2.9 |
| Purine metabolism,<br>adenine containing                   | 1-methyladenosine                 | 1.2 | 0.8 | 1.6 | 1.0 | 1.2 |
|                                                            | adenine                           | 1.1 | 1.4 | 1.4 | 1.8 | 1.9 |
|                                                            | adenosine                         | 1.0 | 1.2 | 2.8 | 2.4 | 2.3 |
|                                                            | adenosine 3',5'-diphosphate       | 1.0 | 3.4 | 4.4 | 1.2 | 1.3 |
|                                                            | adenosine 3'-monophosphate        | 1.4 | 2.4 | 1.8 | 1.8 | 1.3 |
|                                                            | adenosine 5'-diphosphate (ADP)    | 1.9 | 1.2 | 2.1 | 1.1 | 1.7 |
|                                                            | adenosine 5'-monophosphate (AMP)  | 1.2 | 1.8 | 4.3 | 1.9 | 2.4 |
|                                                            | adenylosuccinate                  | 0.7 | 0.9 | 0.9 | 1.2 | 0.9 |
| Purine metabolism,<br>guanine containing                   | guanosine                         | 1.4 | 1.9 | 5.2 | 3.8 | 2.8 |
|                                                            | guanosine 5'- monophosphate (GMP) | 2.4 | 6.9 | 9.2 | 3.2 | 1.3 |
| Purine metabolism, urate<br>metabolism                     | allantoin                         | 1.6 | 1.8 | 1.2 | 1.3 | 2.1 |
|                                                            | urate                             | 2.5 | 6.3 | 1.1 | 2.7 | 6.8 |
| Pyrimidine metabolism,<br>cytidine containing              | cytidine                          | 1.1 | 1.2 | 1.5 | 1.9 | 1.7 |
|                                                            | cytidine 5'-monophosphate         | 1.4 | 1.6 | 3.4 | 1.5 | 2.1 |
| Pyrimidine metabolism,<br>uracil containing                | 3-methyluridine                   | 1.1 | 2.0 | 1.0 | 1.9 | 2.0 |
|                                                            | uracil                            | 1.3 | 1.1 | 1.4 | 1.2 | 1.6 |
|                                                            | uridine                           | 1.1 | 1.6 | 1.2 | 1.6 | 1.9 |
|                                                            | uridine 5'-monophosphate (UMP)    | 2.1 | 4.1 | 1.6 | 1.2 | 2.6 |
| Dipeptide                                                  | aspartylphenylalanine             | 1.6 | 1.1 | 2.6 | 1.8 | 2.8 |
|                                                            | glutamylglutamate                 | 1.3 | 1.0 | 2.2 | 2.8 | 2.2 |
|                                                            | glutamylvaline                    | 1.1 | 0.9 | 0.9 | 0.8 | 0.8 |
|                                                            | glycylleucine                     | 1.8 | 1.3 | 5.2 | 6.9 | 3.9 |
|                                                            | glycylproline                     | 2.1 | 1.0 | 1.2 | 2.6 | 1.2 |
|                                                            | glycylvaline                      | 1.4 | 1.3 | 4.5 | 4.9 | 3.6 |
|                                                            | isoleucinyproline                 | 2.5 | 1.4 | 2.4 | 4.2 | 1.7 |
| g-glutamyl                                                 | gamma-glutamylisoleucine          | 1.0 | 1.1 | 1.0 | 1.2 | 1.2 |
|                                                            | gamma-glutamylleucine             | 0.9 | 1.1 | 1.0 | 1.1 | 1.0 |
|                                                            | gamma-glutamylphenylalanine       | 1.1 | 1.1 | 1.3 | 1.4 | 1.3 |
| Chemical                                                   | glycerol 2-phosphate              | 1.4 | 1.9 | 1.0 | 1.3 | 1.9 |
|                                                            | phenol sulfate                    | 3.1 | 2.4 | 1.1 | 1.5 | 2.2 |
| Drug                                                       | hydroquinone                      | 1.2 | 1.2 | 1.6 | 1.0 | 1.3 |
